# Supplementary material
Source: PubMed Central journal article supplement (PMC6087546)
Supplement: NIHMS981279-supplement-PDF.pdf [file NIHMS981279-supplement-PDF.pdf]

**Supplemental Table 1:** LVI with other components of T-stage

| <b>Multivariable Cox Regression for Disease-Specific Survival<br/>LVI and Components of 7<sup>th</sup>/8<sup>th</sup> AJCC T-Stage System</b> |             |                  |                |
|-----------------------------------------------------------------------------------------------------------------------------------------------|-------------|------------------|----------------|
| <b>Variable</b>                                                                                                                               | <b>HR</b>   | <b>95% CI</b>    | <b>p-value</b> |
| <b>Lymphovascular invasion</b>                                                                                                                | <b>2.14</b> | <b>1.05-4.38</b> | <b>0.04</b>    |
| Tumor invasion                                                                                                                                |             |                  |                |
| Peri-adrenal fat vs. no invasion                                                                                                              | 1.85        | 0.90-3.78        | 0.09           |
| <b>Surr. structures vs. no invasion</b>                                                                                                       | <b>3.53</b> | <b>1.49-8.38</b> | <b>0.004</b>   |
| Tumor size > 5cm                                                                                                                              | 0.70        | 0.23-2.17        | 0.54           |

**Supplemental Table 2:** Univariable Cox regression analyses

| <b>Univariable Cox Regression for Disease-Specific Survival</b> |             |                  |                  |
|-----------------------------------------------------------------|-------------|------------------|------------------|
| <b>Variable</b>                                                 | <b>HR</b>   | <b>95% CI</b>    | <b>p-value</b>   |
| Age (yrs)                                                       | 0.98        | 0.96-1.00        | 0.08             |
| Male gender                                                     | 0.94        | 0.54-1.63        | 0.82             |
| Comorbidities                                                   |             |                  |                  |
| 0                                                               | ref         | ref              | -                |
| 1                                                               | 1.40        | 0.77-2.52        | 0.27             |
| ≥2                                                              | 0.71        | 0.22-2.33        | 0.57             |
| Pain                                                            | 1.23        | 0.71-2.14        | 0.46             |
| Weight loss                                                     | 0.69        | 0.29-1.63        | 0.40             |
| <b>Hormonal hypersecretion</b>                                  | <b>1.98</b> | <b>1.14-3.43</b> | <b>0.02</b>      |
| Right-sided tumor                                               | 1.28        | 0.76-2.18        | 0.35             |
| <b>R1 Resection</b>                                             | <b>2.78</b> | <b>1.59-4.87</b> | <b>&lt;0.001</b> |
| 7 <sup>th</sup> /8 <sup>th</sup> AJCC T-stage                   |             |                  |                  |
| T2 (ref T1)                                                     | 3.48        | 0.46-27.03       | 0.23             |
| T3 (ref T2)                                                     | 1.83        | 0.94-3.58        | 0.08             |
| <b>T4 (ref T3)</b>                                              | <b>2.29</b> | <b>1.21-4.34</b> | <b>0.01</b>      |
| Proposed T-stage                                                |             |                  |                  |
| T2 (ref T1)                                                     | 2.61        | 0.33-20.41       | 0.36             |
| <b>T3 (ref T2)</b>                                              | <b>2.53</b> | <b>1.22-5.24</b> | <b>0.01</b>      |
| <b>T4 (ref T3)</b>                                              | <b>2.11</b> | <b>1.13-3.94</b> | <b>0.02</b>      |
